# Supplementary material
Source: PubMed Central journal article supplement (PMC5748501)
Supplement: 10.1194_M080028_jlr.M080028-1.pdf [file 10.1194_M080028_jlr.M080028-1.pdf]

**Genomic and Lipidomic Analyses Differentiate the Compensatory Roles of Two Cyclooxygenase  
Isoforms during Systemic Inflammation in Mice**

Xinzhi Li<sup>1</sup>, Liudmila L. Mazaleuskaya<sup>2</sup>, Laurel L. Ballantyne<sup>1</sup>, Hu Meng<sup>2</sup>, Garret A. FitzGerald<sup>2</sup>, Colin  
D. Funk<sup>1\*</sup>

<sup>1</sup>Department of Biomedical and Molecular Sciences, Queen's University, Kingston, ON Canada

<sup>2</sup>Institute for Translational Medicine and Therapeutics, Perelman School of Medicine, University of  
Pennsylvania, Philadelphia, PA, USA

*\*Correspondence should be addressed to Colin D. Funk, Department of Biomedical and Molecular  
Sciences, 433 Botterell Hall, 18 Stuart Street, Queen's University, Kingston, Ontario, K7L 3N6, Canada.  
Email: [funkc@queensu.ca](mailto:funkc@queensu.ca)*

Running title: Differential compensation of COX isoforms in inflammation

**Supplemental Table S1:** Primers used in quantitative real-time PCR reactions

| Gene          | Protein                | Primer (5' to 3')                                         |
|---------------|------------------------|-----------------------------------------------------------|
| <i>Rn18s</i>  | 18S rRNA               | F: CTTAGAGGGACAAGTGGCG<br>R: ACGCTGAGCCAGTCAGTGTA         |
| <i>Ptgis</i>  | PGIS                   | F: ACAGCATCAAACAATTTGTGTCGTC<br>R: GCATCAGACCGAAGCCATATCT |
| <i>Ptges</i>  | mPGES-1                | F:ACGACATGGAGACAATCTATCCT<br>R: TGAGGACAACGAGGAAATGT      |
| <i>Hpgds</i>  | H-PGDS                 | F: TGGCCTAAAATCAAGCCAAC<br>R: CCACTGCATCAGCTTGACAT        |
| <i>Lpgds</i>  | L-PGDS                 | F: GGTTCGCGGAGAAGAAAGCT<br>R: CACTGACACGGAGTGGATGC        |
| <i>Akr1b3</i> | AKR1B3 (PGFS)          | F: TCGTGGTGACAGCATATAGTCC<br>R: CCAGGAGAGACGGATCTTCA      |
| <i>Tbxas1</i> | TBXAS1                 | F: TACCATAGTGACTGTGACTCTGC<br>R: GGTGCCTGATGCCCAACTT      |
| <i>Il1b</i>   | IL-1 $\beta$           | F: TGAAGTTGACGGACCCCAA<br>R: TGATGTGCTGCTGCGAGATT         |
| <i>Il6</i>    | IL-6                   | F: TAGTCCTTCTACCCCAATTTCC<br>R: TTGGTCCTTAGCCACTCCTTC     |
| <i>Ccl2</i>   | CCL2 (MCP-1)           | F: TTAAAAACCTGGATCGGAACCAA<br>R: GCATTAGCTTCAGATTTACGGGT  |
| <i>Ccl3</i>   | CCL3 (MIP-1 $\alpha$ ) | F: CTGCAACCAAGTCTTCTCAGC<br>R: CTGCCTCCAAGACTCTCAGG       |

F, forward; R, reverse.

**Supplemental Table S2.** Fold change of the differentially expressed genes detected via Nanostring analysis in macrophages (n=6)

| Gene Name | Accession # | WT<br>vs. Control | COX-2>COX-1<br>vs. Control | COX-1>COX-2<br>vs. Control | <i>Reversa</i><br>vs. Control |
|-----------|-------------|-------------------|----------------------------|----------------------------|-------------------------------|
| Cxcl10    | NM_021274.1 | 16501.61          | 20069.46                   | 12677.09                   | 12043.35                      |
| Csf3      | NM_009971.1 | 2503.34           | 2550.76                    | 2263.88                    | 1801.37                       |
| Cxcl3     | NM_203320.2 | 2796.8            | 2447.54                    | 1483.52                    | 1677.35                       |
| Ccl4      | NM_013652.1 | 1401.6            | 2014.9                     | 1321.53                    | 2023.95                       |
| Nos2      | NM_010927.3 | 1765.59           | 1557.01                    | 1235.49                    | 1261.36                       |
| Ccl7      | NM_013654.2 | 674.78            | 946.78                     | 683.22                     | 957.95                        |
| Ccl3      | NM_011337.1 | 429.08            | 456.7                      | 408.77                     | 629.49                        |
| Ifng      | NM_008337.1 | 342.12            | 309.33                     | 242.29                     | 167.84                        |
| Il1rn     | NM_031167.4 | 279.91            | 357.64                     | 237.32                     | 195.75                        |
| Il22      | NM_016971.1 | 390.44            | 699.34                     | 237.28                     | 824.19                        |
| Cxcl9     | NM_008599.2 | 280.17            | 226.03                     | 180.79                     | 69.48                         |
| Il17a     | NM_010552.3 | 245.89            | 466.97                     | 156.77                     | 1080.49                       |
| Il6       | NM_031168.1 | 146.06            | 147.64                     | 130.31                     | 169.35                        |
| Il1b      | NM_008361.3 | 176.24            | 184.71                     | 115.15                     | 176.39                        |
| Oasl1     | NM_145209.2 | 110.71            | 149.13                     | 112.28                     | 96.73                         |
| Il1a      | NM_010554.4 | 145.93            | 132.35                     | 104.34                     | 142.97                        |
| Il10      | NM_010548.1 | 89.68             | 190.48                     | 94.48                      | 128.63                        |
| Cxcl1     | NM_008176.1 | 129.93            | 134.49                     | 90.75                      | 81.86                         |
| Ccl2      | NM_011333.3 | 88.27             | 110.15                     | 77.34                      | 125.72                        |
| Ifit1     | NM_008331.2 | 81.33             | 99.23                      | 60.45                      | 77.08                         |
| Tlr3      | NM_126166.2 | 61.8              | 52.68                      | 50.31                      | 35.09                         |
| Cxcl2     | NM_009140.2 | 68.87             | 67.1                       | 50                         | 53.7                          |
| Iigp1     | NM_021792.3 | 47.94             | 44.62                      | 40.09                      | 36.1                          |
| Ifi44     | NM_133871.2 | 68.79             | 79.99                      | 38.46                      | 35.8                          |
| Cxcr2     | NM_009909.3 | 32.54             | 30.93                      | 35.96                      | 48.85                         |
| Ccl22     | NM_009137.2 | 42.4              | 69.8                       | 35.87                      | 72.58                         |
| Tnfaip3   | NM_009397.2 | 33.87             | 34.09                      | 27.78                      | 29.91                         |
| Ifit2     | NM_008332.2 | 33.42             | 47.81                      | 27.59                      | 26.4                          |

|         |                |       |       |       |       |
|---------|----------------|-------|-------|-------|-------|
| Ifit3   | NM_010501.1    | 27.85 | 41.59 | 27.49 | 25.71 |
| Cxcl5   | NM_009141.2    | 45.07 | 42.22 | 24.45 | 21.65 |
| Flt1    | NM_010228.3    | 15.55 | 11.91 | 23.77 | 26.17 |
| Ccl8    | NM_021443.2    | 33.03 | 30.13 | 21.64 | 40.1  |
| Maff    | NM_010755.3    | 17.33 | 20.54 | 20.09 | 18.69 |
| Irf7    | NM_016850.2    | 18.78 | 19.73 | 18.7  | 16.79 |
| Mef2b   | NM_001045484.1 | 14.01 | 20.13 | 18.62 | 12.5  |
| Ccl5    | NM_013653.1    | 27.06 | 26.62 | 18.4  | 12.43 |
| Tnf     | NM_013693.1    | 10.2  | 10.24 | 14.76 | 16.57 |
| Mx2     | NM_013606.1    | 15.06 | 22.54 | 13.57 | 14.58 |
| Il13    | NM_008355.2    | 5.01  | 9.61  | 13.39 | 26.2  |
| C1s     | NM_144938.2    | 11.78 | 7.15  | 9.57  | 7.49  |
| Areg    | NM_009704.3    | 9.8   | 13.59 | 9.28  | 21.64 |
| Mx1     | NM_010846.1    | 12.66 | 11.57 | 8.63  | 9.3   |
| Nlrp3   | NM_145827.3    | 10.31 | 7.66  | 7.68  | 6.51  |
| Il5     | NM_010558.1    | 7.6   | 15.58 | 7.46  | 40.51 |
| Csf2    | NM_009969.4    | 16.8  | 16.99 | 7.38  | 34.97 |
| Cfb     | NM_008198.2    | 7.99  | 6.36  | 6.97  | 5.23  |
| Ccl17   | NM_011332.2    | 8.13  | 9.65  | 6.62  | 6.5   |
| Oas1a   | NM_145211.2    | 6.06  | 6.15  | 6.11  | 4.97  |
| Daxx    | NM_007829.3    | 6.21  | 6.13  | 5.74  | 5.48  |
| Hif1a   | NM_010431.2    | 6.53  | 6.81  | 5.64  | 5.48  |
| Irf1    | NM_008390.1    | 6.19  | 5.61  | 5.54  | 5.41  |
| Jun     | NM_010591.2    | 4.58  | 5.12  | 4.82  | 5.85  |
| Tgfb3   | NM_009368.2    | 8.13  | 11.24 | 4.39  | 6.75  |
| Il15    | NM_008357.1    | 4.16  | 4.13  | 4.31  | 3.24  |
| Csf1    | NM_001113530.1 | 3.95  | 3.38  | 3.8   | 4.02  |
| Il23r   | NM_144548.1    | 5.74  | 4.41  | 3.73  | 5.97  |
| Cd40    | NM_011611.2    | 3.79  | 4.02  | 3.67  | 3.54  |
| Pla2g4a | NM_008869.2    | 4.41  | 4.18  | 3.64  | 3.33  |
| Il4     | NM_021283.1    | 2.29  | 2.98  | 3.6   | 5.84  |
| Nod2    | NM_145857.2    | 3.24  | 2.27  | 3.57  | 3.16  |

|          |                |       |       |       |       |
|----------|----------------|-------|-------|-------|-------|
| Il12b    | NM_008352.1    | 3.4   | 5.79  | 3.49  | 3.16  |
| Bcl2l1   | NM_009743.4    | 4.3   | 4.08  | 3.24  | 3.39  |
| Cd86     | NM_019388.3    | 3.6   | 4.84  | 3.16  | 3.54  |
| Il11     | NM_008350.2    | 3.45  | 4     | 3.07  | 7.15  |
| Stat2    | NM_019963.1    | 2.98  | 2.59  | 3.07  | 2.78  |
| Myd88    | NM_010851.2    | 3.66  | 2.62  | 3.04  | 2.96  |
| Myc      | NM_010849.4    | 2.92  | 3.85  | 3     | 3.33  |
| Il18rap  | NM_010553.2    | 5.16  | 3.03  | 2.67  | 2.36  |
| Stat3    | NM_213659.2    | 2.91  | 3.39  | 2.64  | 2.68  |
| Mafk     | NM_010757.2    | 2.65  | 2.8   | 2.61  | 2.58  |
| Stat1    | NM_009283.3    | 2.85  | 2.62  | 2.58  | 2.17  |
| Il1r1    | NM_001123382.1 | 4.41  | 2.95  | 2.53  | 2.41  |
| Relb     | NM_009046.2    | 2.64  | 2.77  | 2.24  | 2.42  |
| Chi3l3   | NM_009892.1    | 2.43  | 4.71  | 2.13  | 9.11  |
| Mknk1    | NM_021461.4    | -2.61 | -2.72 | -2.21 | -2.48 |
| Ccr4     | NM_009916.2    | -2.58 | -2.22 | -2.24 | -2.56 |
| C1qb     | NM_009777.2    | -2.19 | -2.68 | -2.39 | -3.48 |
| Hmgb1    | NM_010439.3    | -2.47 | -2.47 | -2.49 | -2.31 |
| Ppp1r12b | NM_001081307.1 | -2.8  | -5.87 | -2.52 | -2.64 |
| Nfatc3   | NM_010901.2    | -2.49 | -2.75 | -2.55 | -2.39 |
| Itgb2    | NM_008404.4    | -2.45 | -2.63 | -2.61 | -2.77 |
| Prkcb    | NM_008855.2    | -2.74 | -2.84 | -2.61 | -2.61 |
| Ccr1     | NM_009912.4    | -2.18 | -2.17 | -2.77 | -2.64 |
| Mmp9     | NM_013599.2    | -2.69 | -2.57 | -2.82 | -2.56 |
| Il6ra    | NM_010559.2    | -3.46 | -4.63 | -2.9  | -3.64 |
| Map3k5   | NM_008580.4    | -2.32 | -2.1  | -3.23 | -2.79 |
| Map3k1   | NM_011945.2    | -3.92 | -3.35 | -3.24 | -3.36 |
| Tyrobp   | NM_011662.2    | -3.03 | -2.88 | -3.27 | -3.8  |
| Mef2c_Mm | NM_025282.2    | -2.98 | -2.92 | -3.38 | -3.83 |
| Prkca    | NM_011101.3    | -2.75 | -2.7  | -3.43 | -2.75 |
| Twist2   | NM_007855.2    | -3.18 | -5.6  | -3.65 | -3.29 |
| Fxyd2    | NM_052823.2    | -2.06 | -2.08 | -3.69 | -4.16 |

|         |                |         |         |         |         |
|---------|----------------|---------|---------|---------|---------|
| Retnla  | NM_020509.3    | -2.43   | -3.17   | -3.71   | -6.24   |
| C3ar1   | NM_009779.2    | -3.84   | -4.18   | -3.75   | -3.82   |
| C1qa    | NM_007572.2    | -3.61   | -3.98   | -4      | -6.36   |
| Ltb4r1  | NM_008519.2    | -3.28   | -4.14   | -4.04   | -2.51   |
| Ptger2  | NM_008964.4    | -5.19   | -4.15   | -4.12   | -5.39   |
| Mapk14  | NM_011951.2    | -4.83   | -5.63   | -4.16   | -4.42   |
| Rps6ka5 | NM_153587.2    | -4.68   | -4.01   | -4.58   | -5.2    |
| Cd40lg  | NM_011616.2    | -3.7    | -2.83   | -4.65   | -5.37   |
| Tslp    | NM_021367.1    | -4.36   | -4.55   | -4.72   | -6.32   |
| Mapk3   | NM_011952.2    | -5.34   | -5.72   | -4.87   | -5.44   |
| Trem2   | NM_031254.2    | -4.54   | -7.54   | -4.9    | -13.57  |
| Cd4     | NM_013488.2    | -5.85   | -3.85   | -7.26   | -9.25   |
| Cysltr1 | NM_021476.4    | -5.93   | -6.3    | -7.49   | -7.26   |
| Cd55    | NM_010016.2    | -7.49   | -8.71   | -7.73   | -4.98   |
| Alox5   | NM_009662.2    | -6.45   | -7.57   | -7.79   | -7.37   |
| Alox15  | NM_009660.3    | -8.28   | -6.85   | -10.13  | -9.71   |
| Ltb     | NM_008518.2    | -13.15  | -9.54   | -16.2   | -17.32  |
| Ccr2    | NM_009915.2    | -25.7   | -27.33  | -29.53  | -17.11  |
| Tbxa2r  | NM_001277265.1 | -42.99  | -43.15  | -42.21  | -38.66  |
| Map2k6  | NM_011943.2    | -52.09  | -32.98  | -52.17  | -34.25  |
| Tgfb2   | NM_009367.1    | -226.65 | -150.14 | -118.03 | -129.45 |

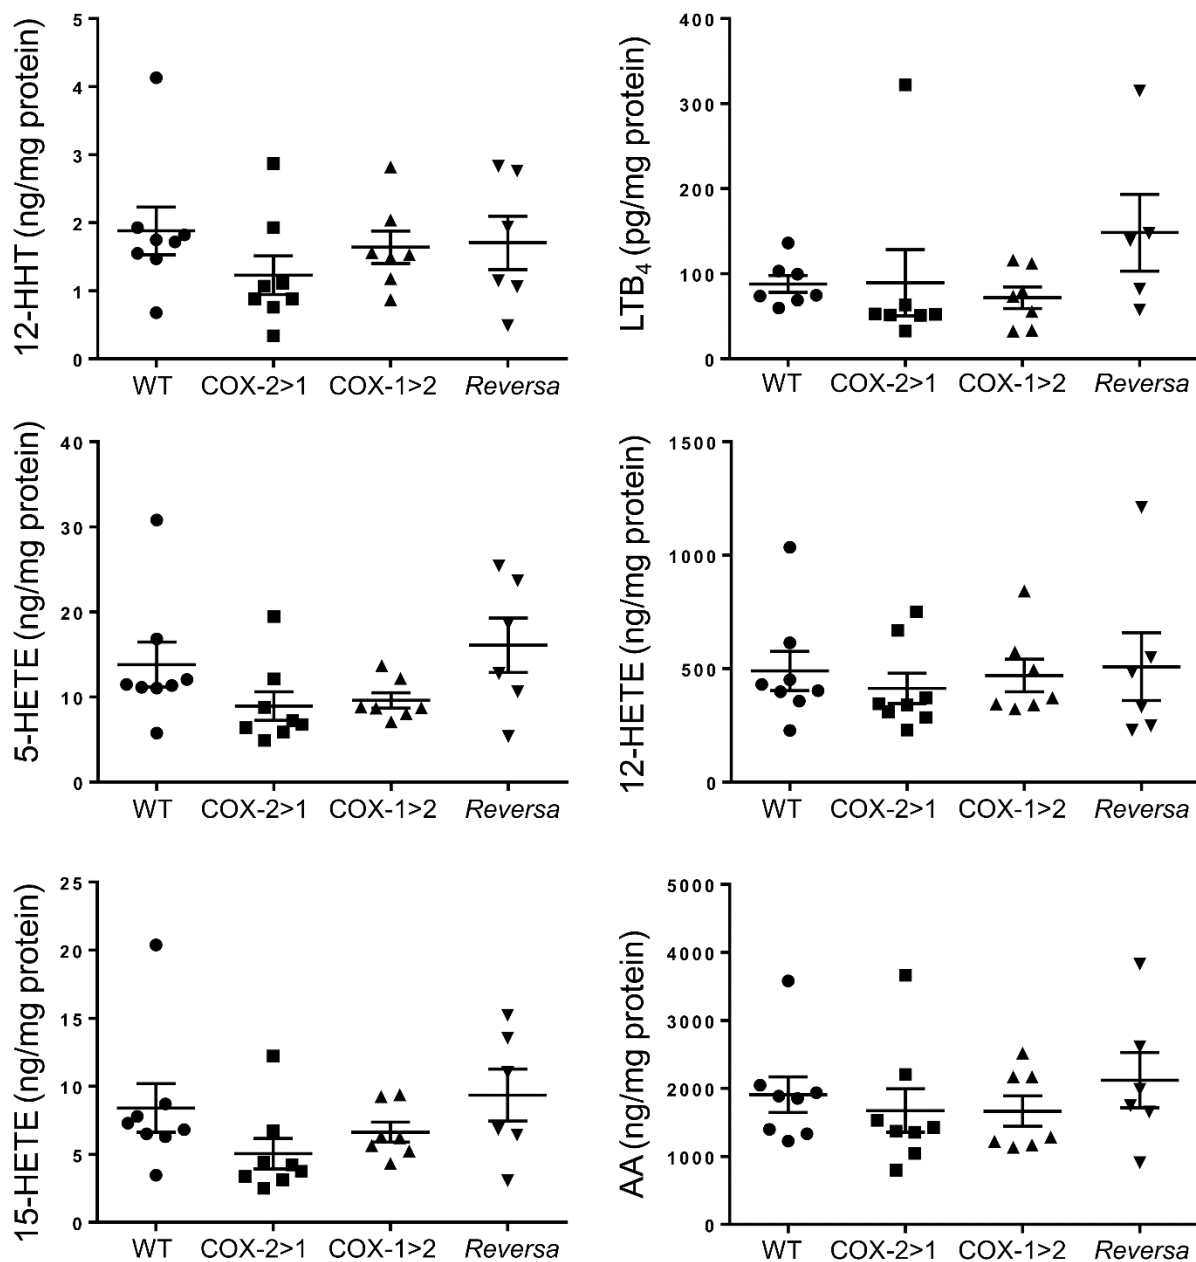

**Supplemental Fig. S1. AA and downstream eicosanoid profiles in the renal medulla.** Renal medulla was dissected after 6 h of LPS peritoneal administration, and then subjected to LC-MS/MS assays. Data are presented as mean ± SEM, n =6-8.

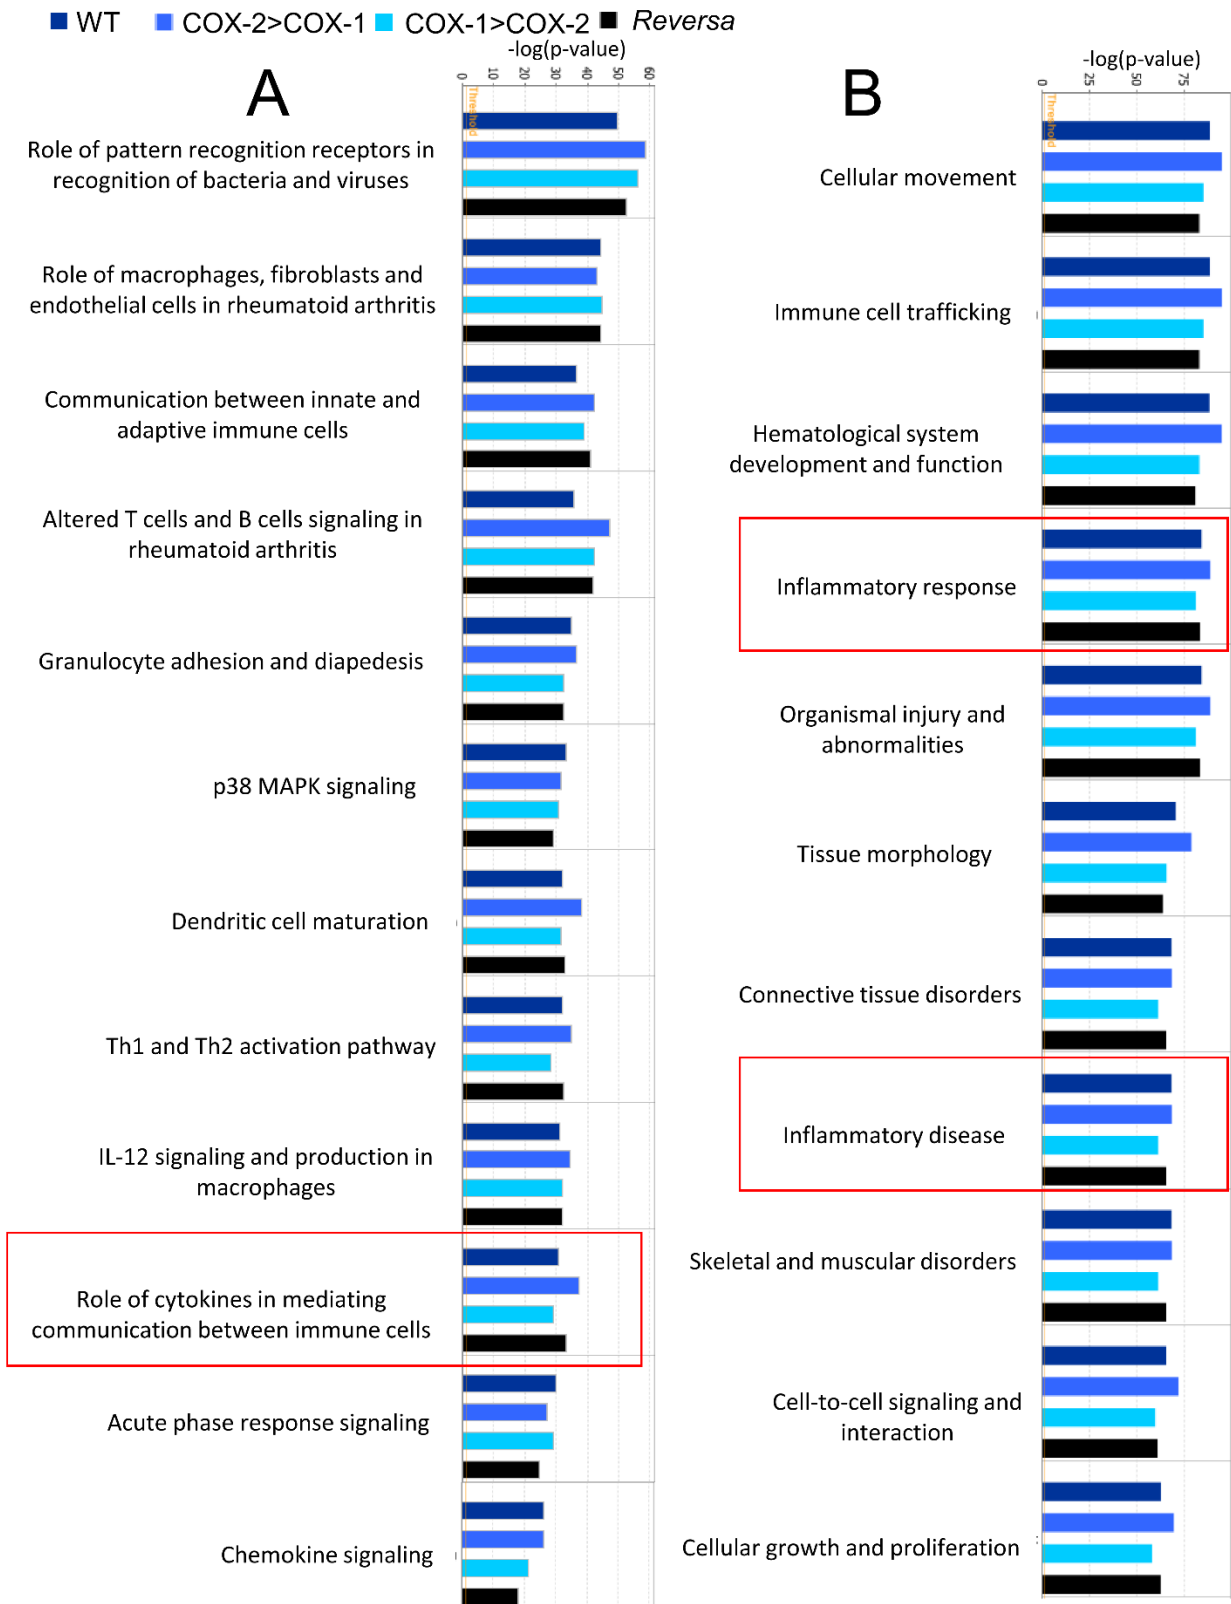



**Supplemental Fig. S2. Comparison of the canonical pathways (A) and biological function (B) among the genes affected by the *Ptgs* gene exchange.** Significant regulated pathways were determined by Ingenuity Pathway Analysis (IPA). Core analysis between the Control group and 4 LPS-challenged genotypes of mice was performed prior to the comparison analysis between 4 LPS-challenged groups (WT, COX-2>COX-1, COX-1>COX-2, and *Reversa*).
